# Supplementary material for: The Epstein Barr virus circRNAome
Source: PLoS Pathog. 2018 Aug 6;14(8):e1007206. doi: 10.1371/journal.ppat.1007206 (PMC6095625; doi:10.1371/journal.ppat.1007206)
Supplement: S2 Table — Note that some of the less abundant backsplices (e.g. several of the RPMS1 and the circBHRF1 backsplice junctions) met the 5 read minimum threshold in RNase R sequencing of nuclear and/or cytoplasmic fractions but show less than 5 reads in any whole cell sequencing data displayed here. (XLSX) [file ppat.1007206.s009.xlsx]

## Sheet: Sheet1
S2 Table. Junction spanning read counts (minimum 12 base overhang and 90% homology) derived from realignment to conjoined backsplice junctions. Note that some of the less abundant backsplices (e.g. several of the RPMS1 and the circBHRF1 backsplice junctions) met the 5 read minimum threshold in RNase R sequencing of nuclear and/or cytoplasmic fractions but show less than 5 reads in any whole cell …
			B-cell latency type I					B-cell latency type III				Gastric Cancer
	chrEBV_Akata_inverted		Akata		Mutu I		Sav I	Mutu III	IB4	Jijoye	JY	SNU719	YCCEL1	Scale (max counts)
ID	Coord. 1	Coord. 2	Lat	React	Lat	React	Lat	Lat
ebv-circEBNA_W1_C1	74608	multiple	0	1	0	0	0	3	0	4	28	0	0	40
ebv-circEBNA_W2_C1	74608	multiple	0	0	0	0	0	6	0	3	40	0	0
ebv-circEBNA_U	118461	118632	0	74	11	38	0	9	11	15	27	0	0	74
ebv-circRPMS1_E4_E3a	41172	41939	8	109	15	42	35	3	0	94	0	90	142	380
ebv-circRPMS1_E4_E2	37822	41939	10	380	46	203	26	3	0	36	0	7	19
ebv-circRPMS1_E7_E2	37822	51506	1	114	23	81	0	0	0	0	0	0	0
ebv-circRPMS1_E7_E3a	41172	51506	2	151	7	49	0	0	0	2	0	1	0
ebv-circRPMS1_E7_E3b	41514	51506	0	2	11	3	0	0	0	1	0	0	0
ebv-circRPMS1_E7_E4	41828	51506	0	1	1	8	0	0	0	0	0	0	0
ebv-circRPMS1_E7_E5	46855	51506	2	66	10	98	0	3	6	16	4	5	3
ebv-circRPMS1_E7_E5.1	48115	51506	2	31	8	82	3	0	0	0	0	0	0
ebv-circRPMS1_E7_E5.2	48233	51506	0	42	12	13	0	0	0	0	1	0	0
ebv-circRPMS1_E7_E6	48434	51506	0	17	1	19	0	0	0	0	0	0	0
ebv-circRPMS1_E7_E7	50213	51506	0	3	1	6	0	0	0	1	2	2	10
ebv-circRPMS1_E3b_E2	37822	41668	0	0	0	1	0	0	0	0	0	0	0
ebv-circRPMS1_E6_E3	41172	48516	0	0	0	0	0	0	0	1	0	0	0
ebv-circRPMS1_E6_E5	46855	48516	0	0	0	0	0	0	3	2	3	0	0
ebv-circRPMS1_In1a_In1	30887	31340	0	0	0	0	0	0	0	0	0	0	0
ebv-circRPMS1_In1a_In1p	30974	31340	0	0	0	0	0	0	0	0	0	0	0
ebv-circLMP2_E8_E2	63427	65051	6	348	0	9	0	0	5	0	0	0	0	348
ebv-circLMP2_E7_E2	63427	64864	0	34	0	0	0	0	0	0	0	0	0
ebv-circLMP2_E5_E3	63729	64320	0	3	0	0	0	0	2	0	16	2	0
ebv-circLMP2_E8_E3	63729	65051	0	9	0	0	0	0	0	0	0	0	0
ebv-circLMP2_E5_E4	63909	64320	0	1	0	0	0	0	1	0	8	0	2
ebv-circLMP2_E4_E3	63729	64157	0	0	0	0	0	0	3	0	8	0	0
ebv-circLMP2_E1_RPMS1_E3	41172	58045	0	0	0	1	0	0	0	0	0	0	0
ebv-circLMP2_E1_A73_E3	51369	58045	0	3	0	8	0	0	0	0	0	0	0
ebv-circBHLF1	103171	103462	28	1554	27	351	2	0	0	12	12	15	105	1554
ebv-circBGLF1_BHLF1	5021	103462	0	15	2	5	0	0	0	0	0	0	0	15
ebv-circBDLF1_BHLF1	11225	103462	0	5	0	0	0	0	0	0	0	0	0
ebv-circBXLF1_BHLF1	22382	103462	0	0	0	2	0	0	0	0	0	0	0
ebv-circBILF2_BHLF1	29079	103462	0	1	0	0	0	0	0	0	0	0	0
ebv-circBHRF1	105315	105843	0	4	0	0	0	0	0	0	0	0	0	4
